# Supplementary figures and images for: Diels–Alder functionalized carbon nanotubes for bone tissue engineering: in vitro/in vivo biocompatibility and biodegradability
Source: Royal Society of Chemistry journal article supplement (doi:10.1039/c5nr01829c), 2015-01-01

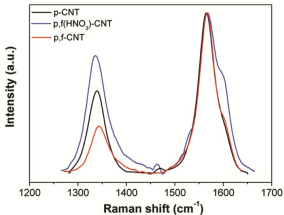

Supplement: c5nr01829c2.pdf [file c5nr01829c2.pdf]

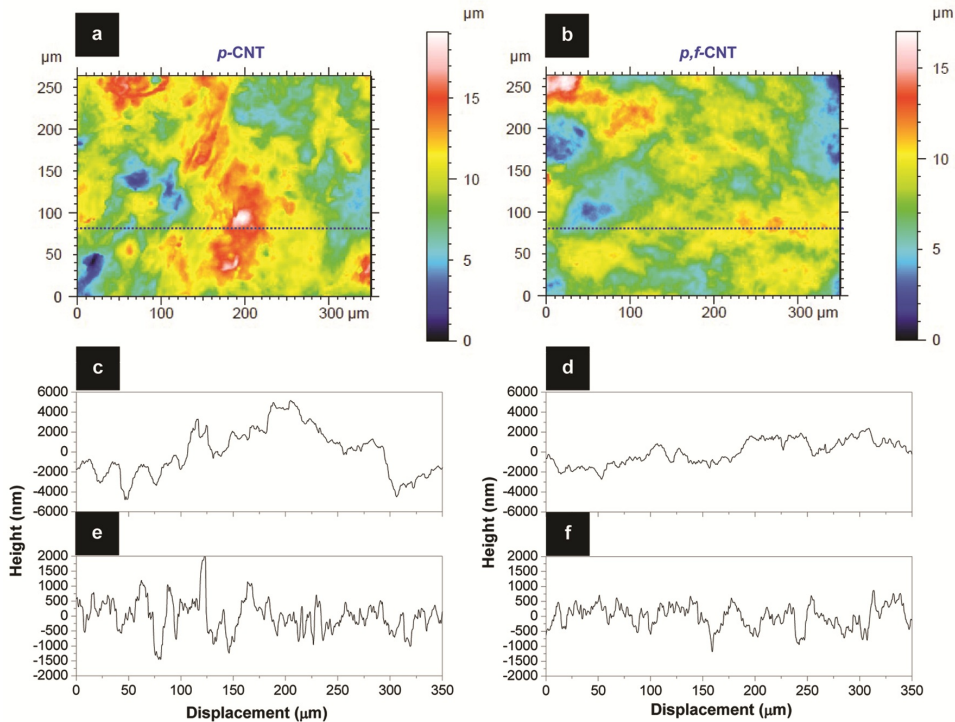

Supplement: c5nr01829c7.pdf [file c5nr01829c7.pdf]
